# Supplementary material for: Combined phase behavior, dynamic light scattering, viscosity and spectroscopic investigations of a pyridinium-based ionic liquid-in-oil microemulsion
Source: Royal Society of Chemistry journal article supplement (doi:10.1039/c4ra01209g), 2014-01-01
Supplement: c4ra01209g1.pdf [file c4ra01209g1.pdf]

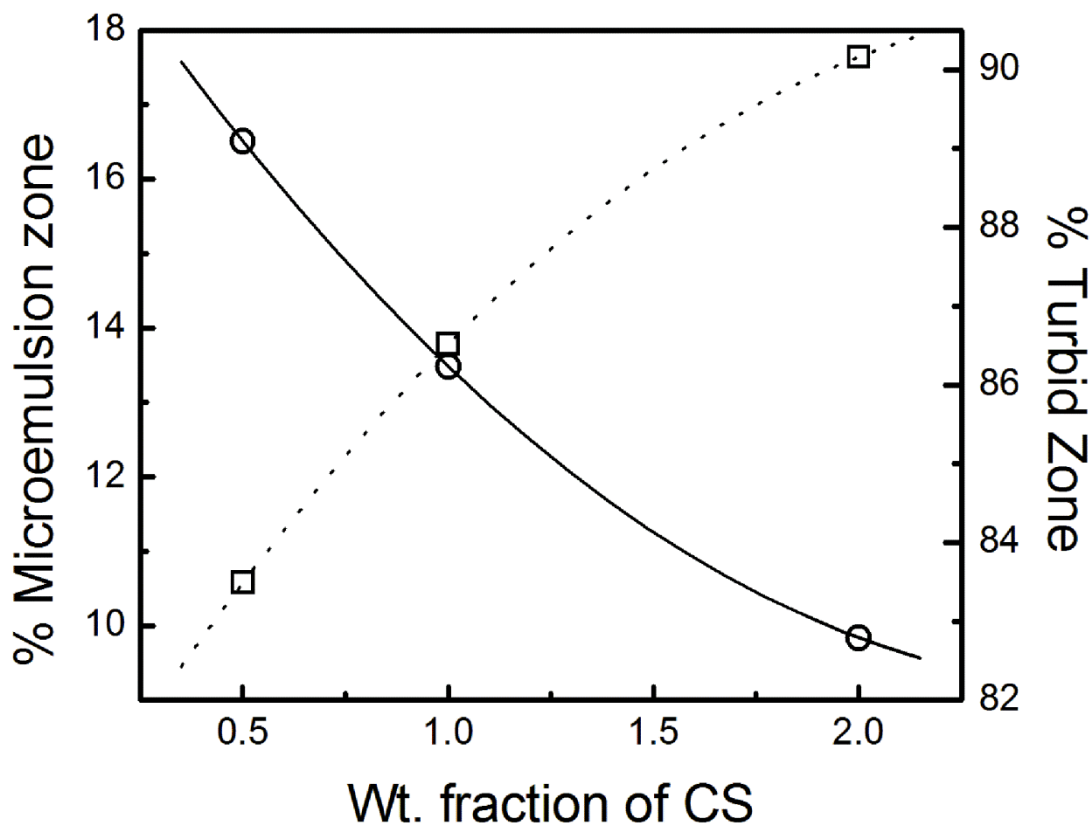

Figure S1. Variation in the area under clear (O) and turbid (□) regions with the weight fraction of n-pentanol (CS) for  $[b_4\text{mpy}][\text{BF}_4]/(\text{Tween-20}+\text{n-pentanol})/\text{n-heptane}$  pseudo-ternary system at 298 K.

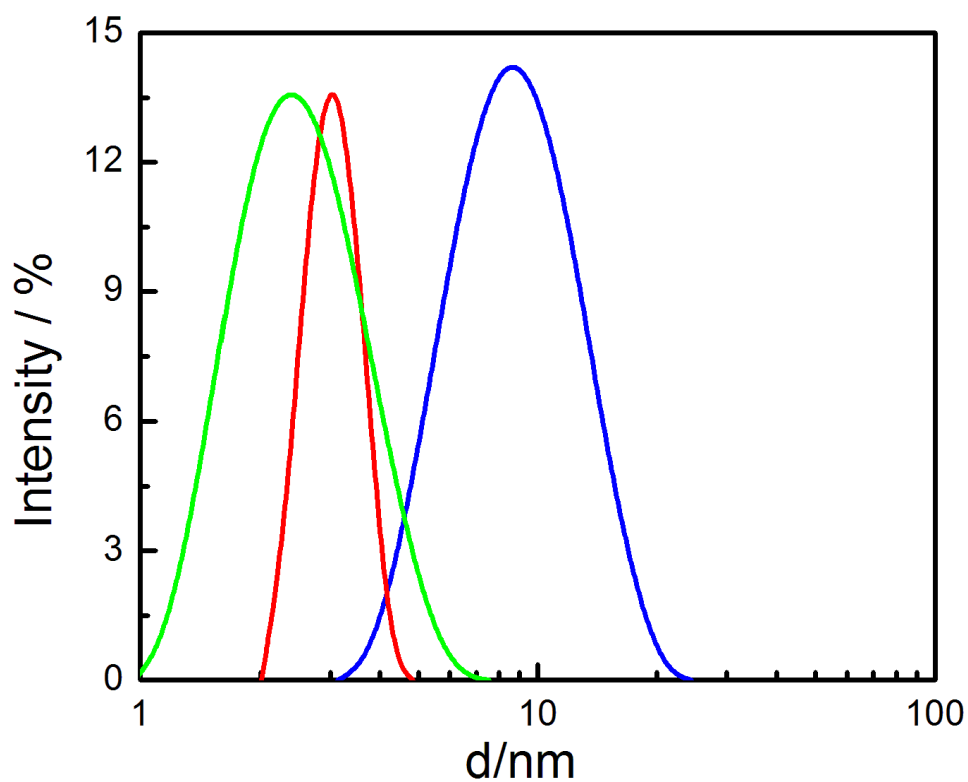

Fig S2. Dependence of size distribution on Tween20/n-pentanol (S/CS) ratio for  $[b_4\text{mpy}][\text{BF}_4]/(\text{Tween-20}+\text{n-pentanol})/\text{n-heptane}$  IL-in-oil microemulsion systems. Tween 20/ n-pentanol ratio (w/w): 1:0.5, blue line; 1:1, red line and 1:2, green line.

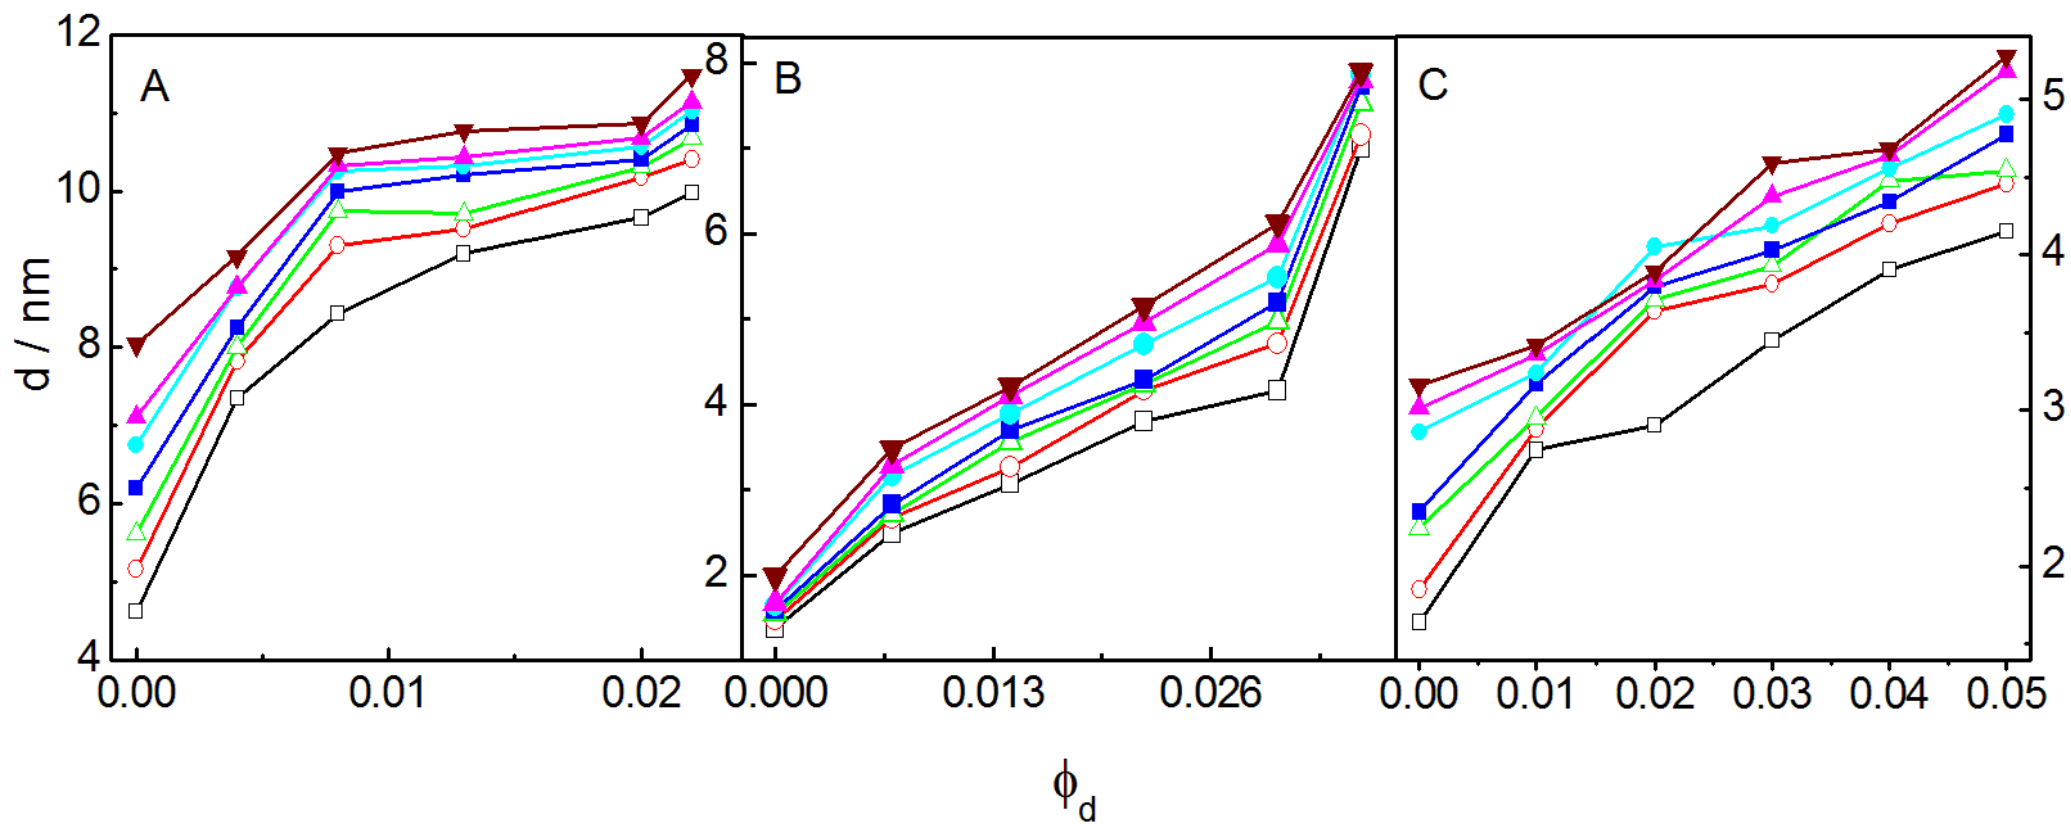

Figure S3. Variation in size ( $d$ ) of  $[b_4mpy][BF_4]/(\text{Tween-20}+n\text{-pentanol})/n\text{-heptane}$  IL-in-oil microemulsion systems with the volume fraction ( $\phi_d$ ) of IL. Tween 20/ $n$ -pentanol ratio (w/w): A, 1:0.5; B, 1:1 and C, 1:2. Temp. (K):  $\square$ , 293;  $\circ$ , 298;  $\Delta$ , 303;  $\blacksquare$ , 308;  $\bullet$ , 313;  $\blacktriangle$ , 318 and  $\blacktriangledown$ , 323.

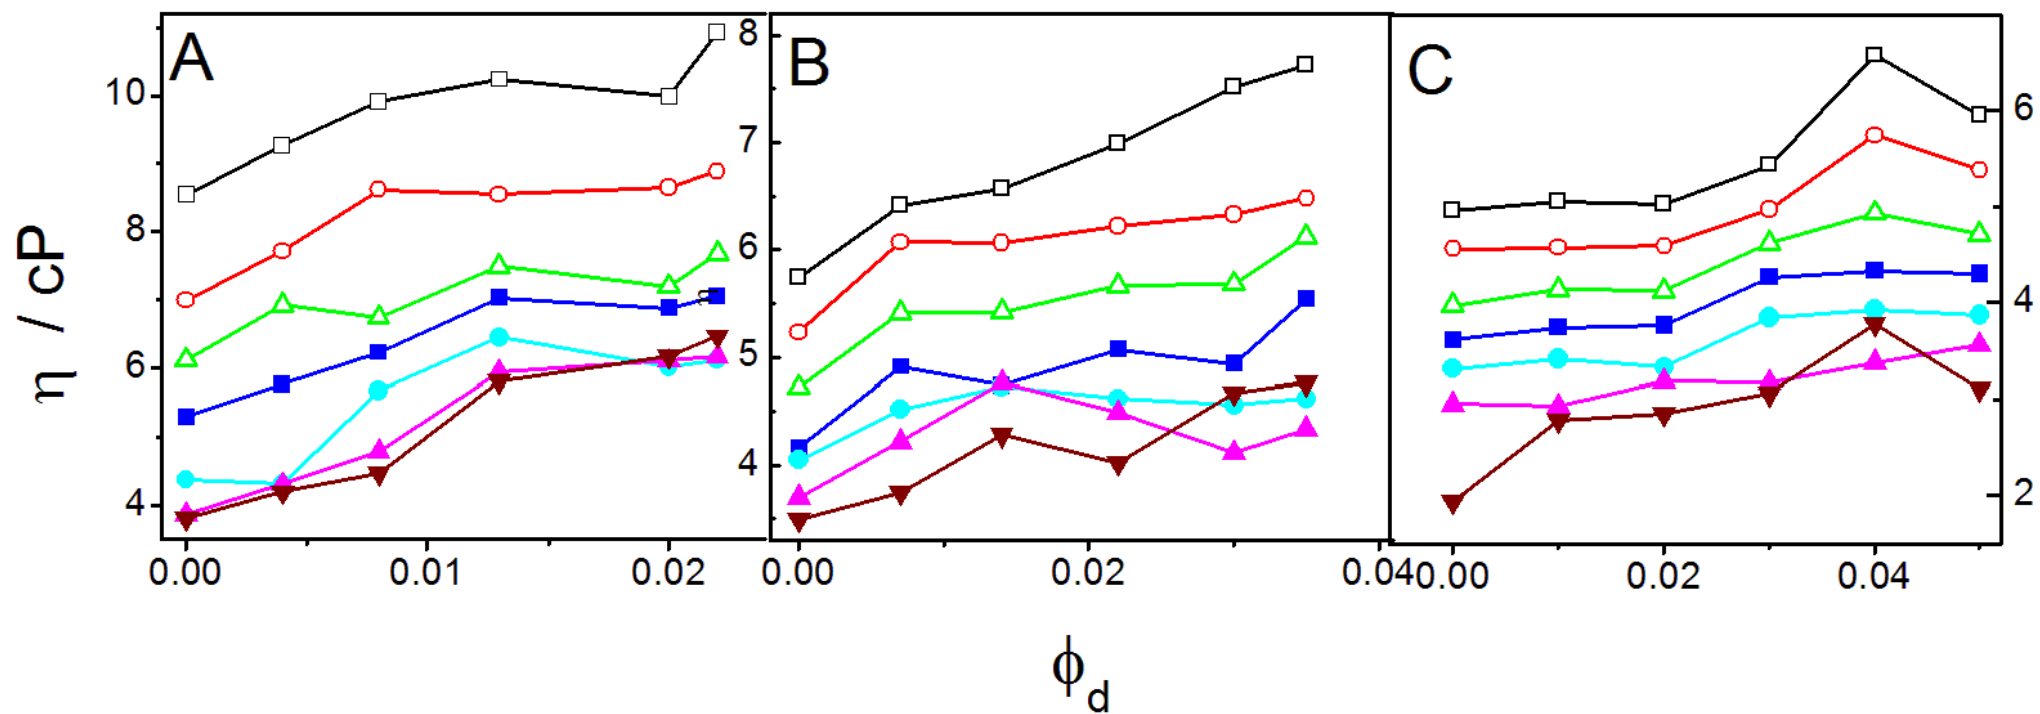

Figure S4. Variation in viscosity ( $\eta$ ) of  $[b_4mpy][BF_4]/(\text{Tween-20}+n\text{-pentanol})/n\text{-heptane}$  IL-in-oil microemulsion with the volume fraction ( $\phi_d$ ) of IL. Tween 20/ $n$ -pentanol ratio (w/w): A, 1:0.5; B, 1:1 and C, 1:2. Temp. (K):  $\square$ , 293;  $\circ$ , 298;  $\Delta$ , 303;  $\blacksquare$ , 308;  $\bullet$ , 313;  $\blacktriangle$ , 318 and  $\blacktriangledown$ , 323.
